# Supplementary material for: The Gut Microbial Diversity of Newly Diagnosed Diabetics but Not of Prediabetics Is Significantly Different from That of Healthy Nondiabetics
Source: PubMed Central journal article supplement (PMC7112960; doi:10.1128/msystems.00578-19), 2020-03-31

Fig. S2 A

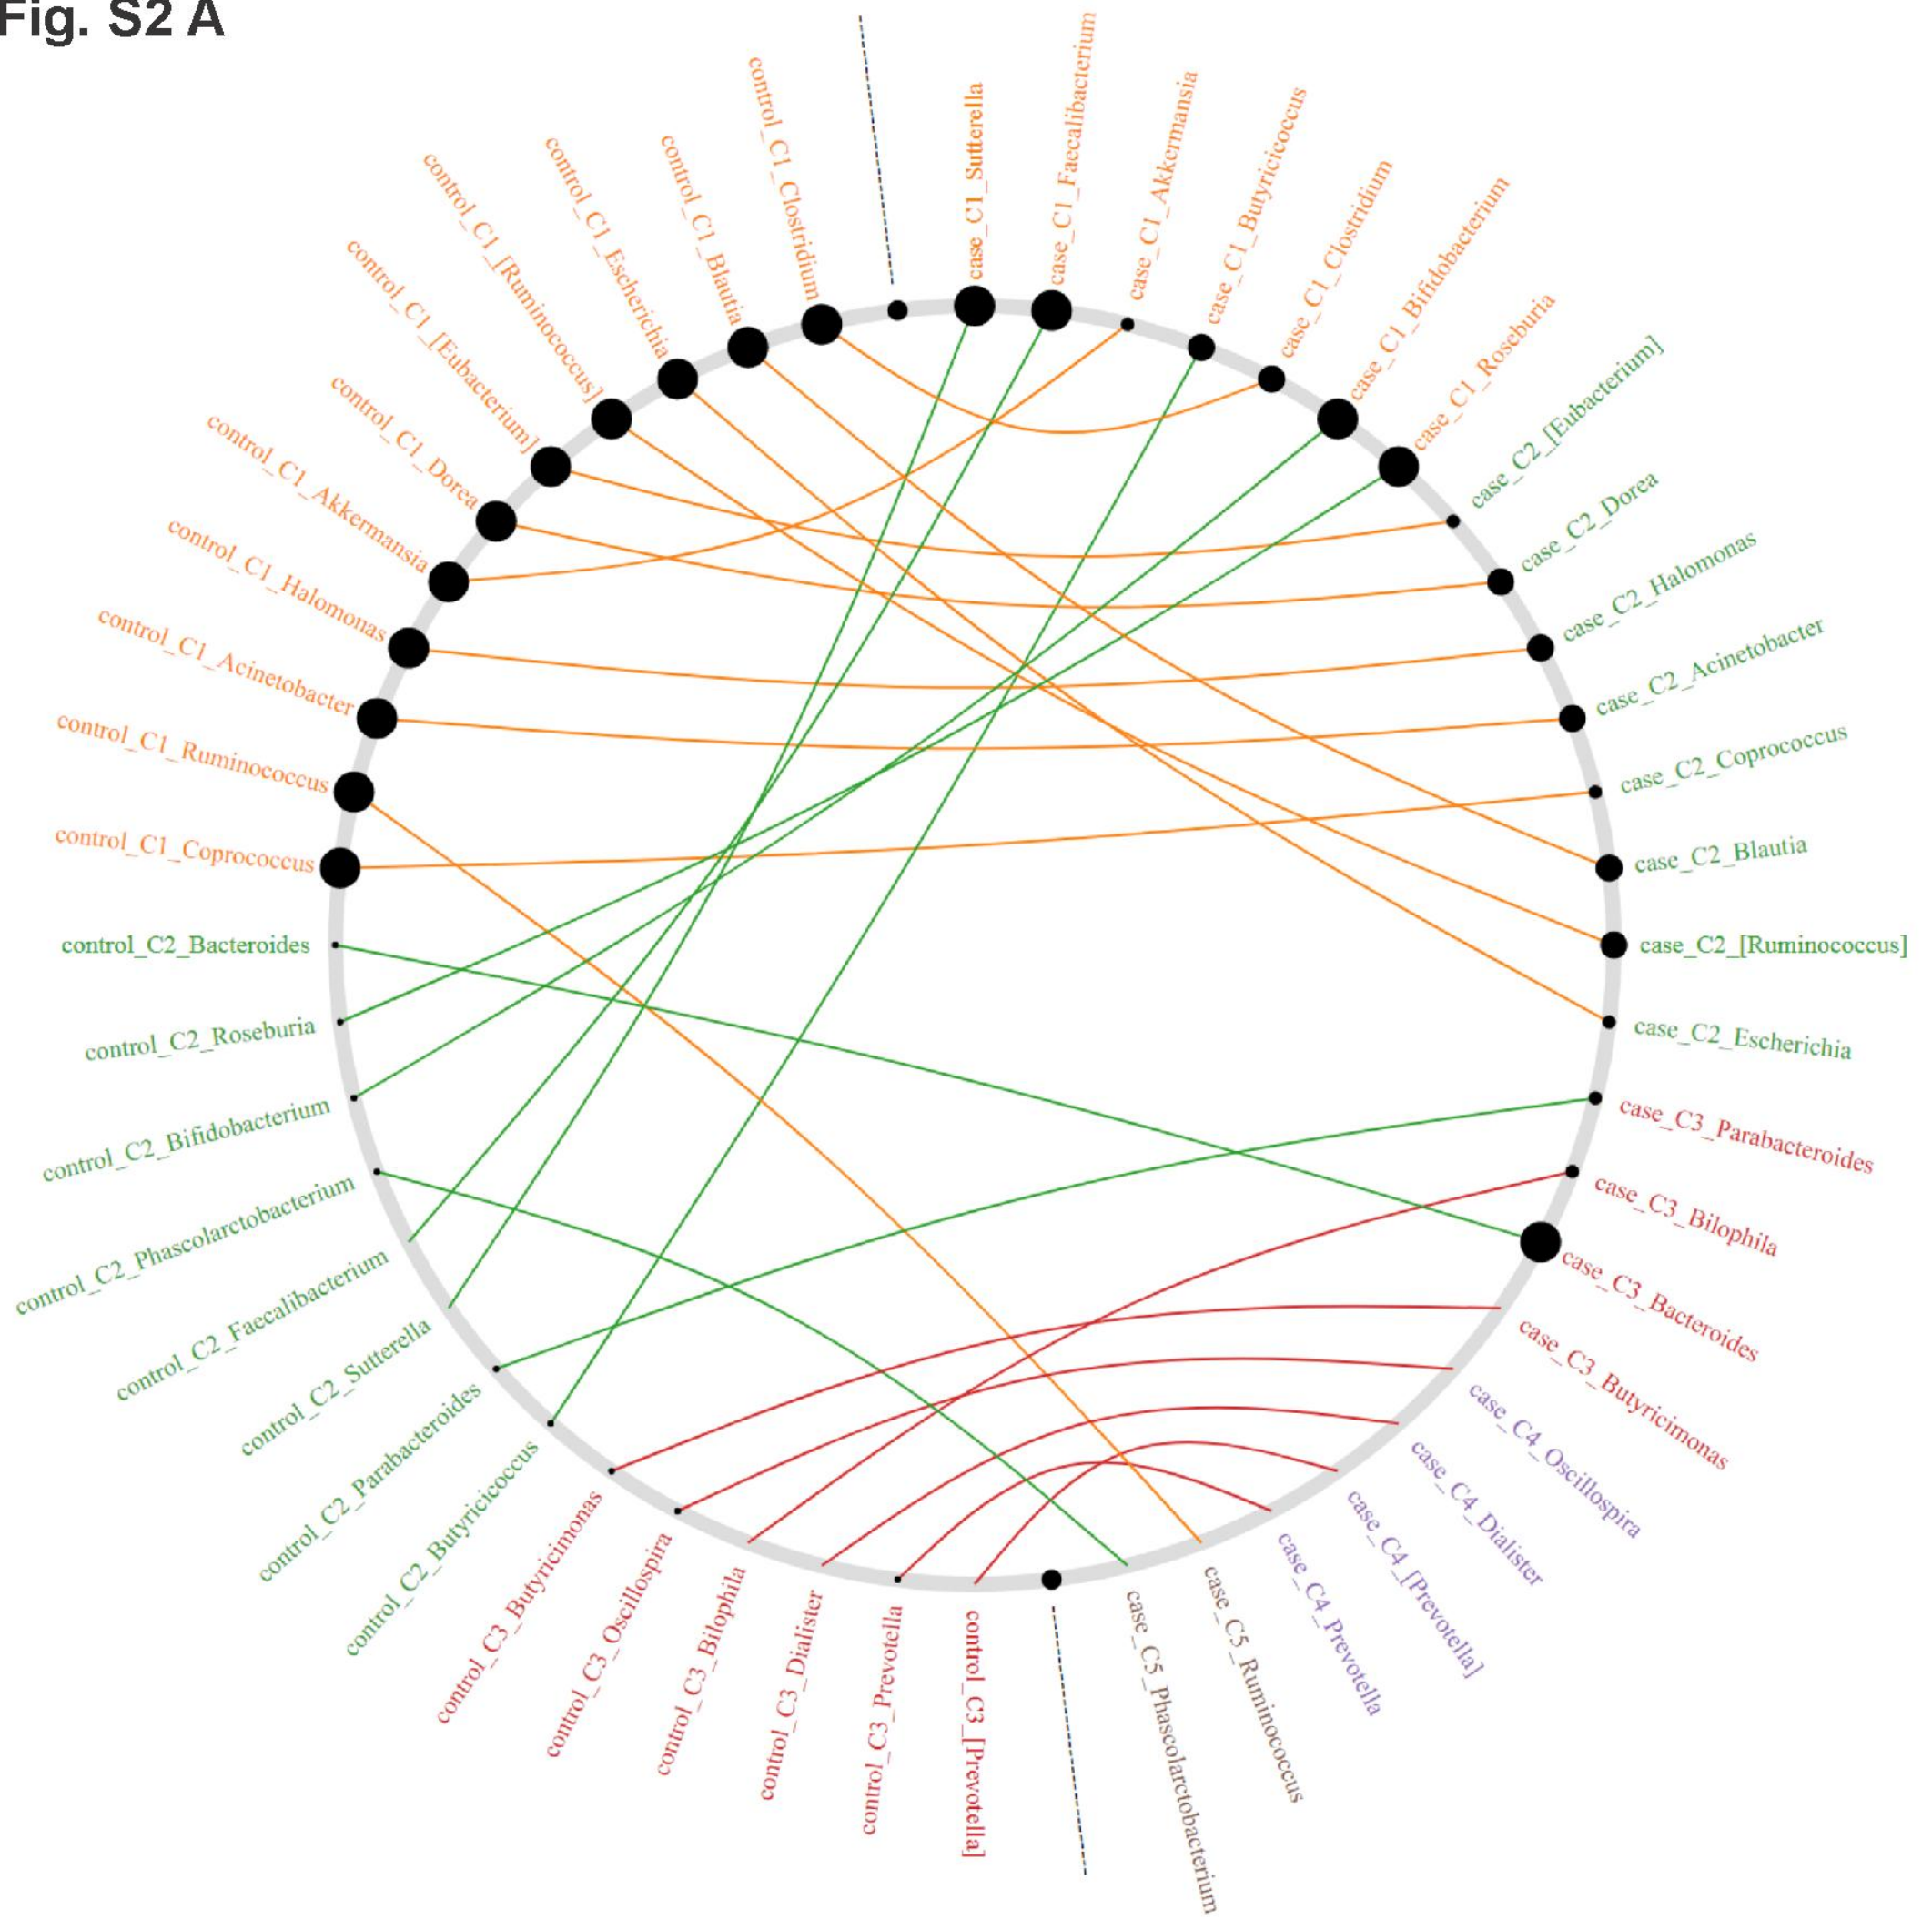

Fig. S2 B

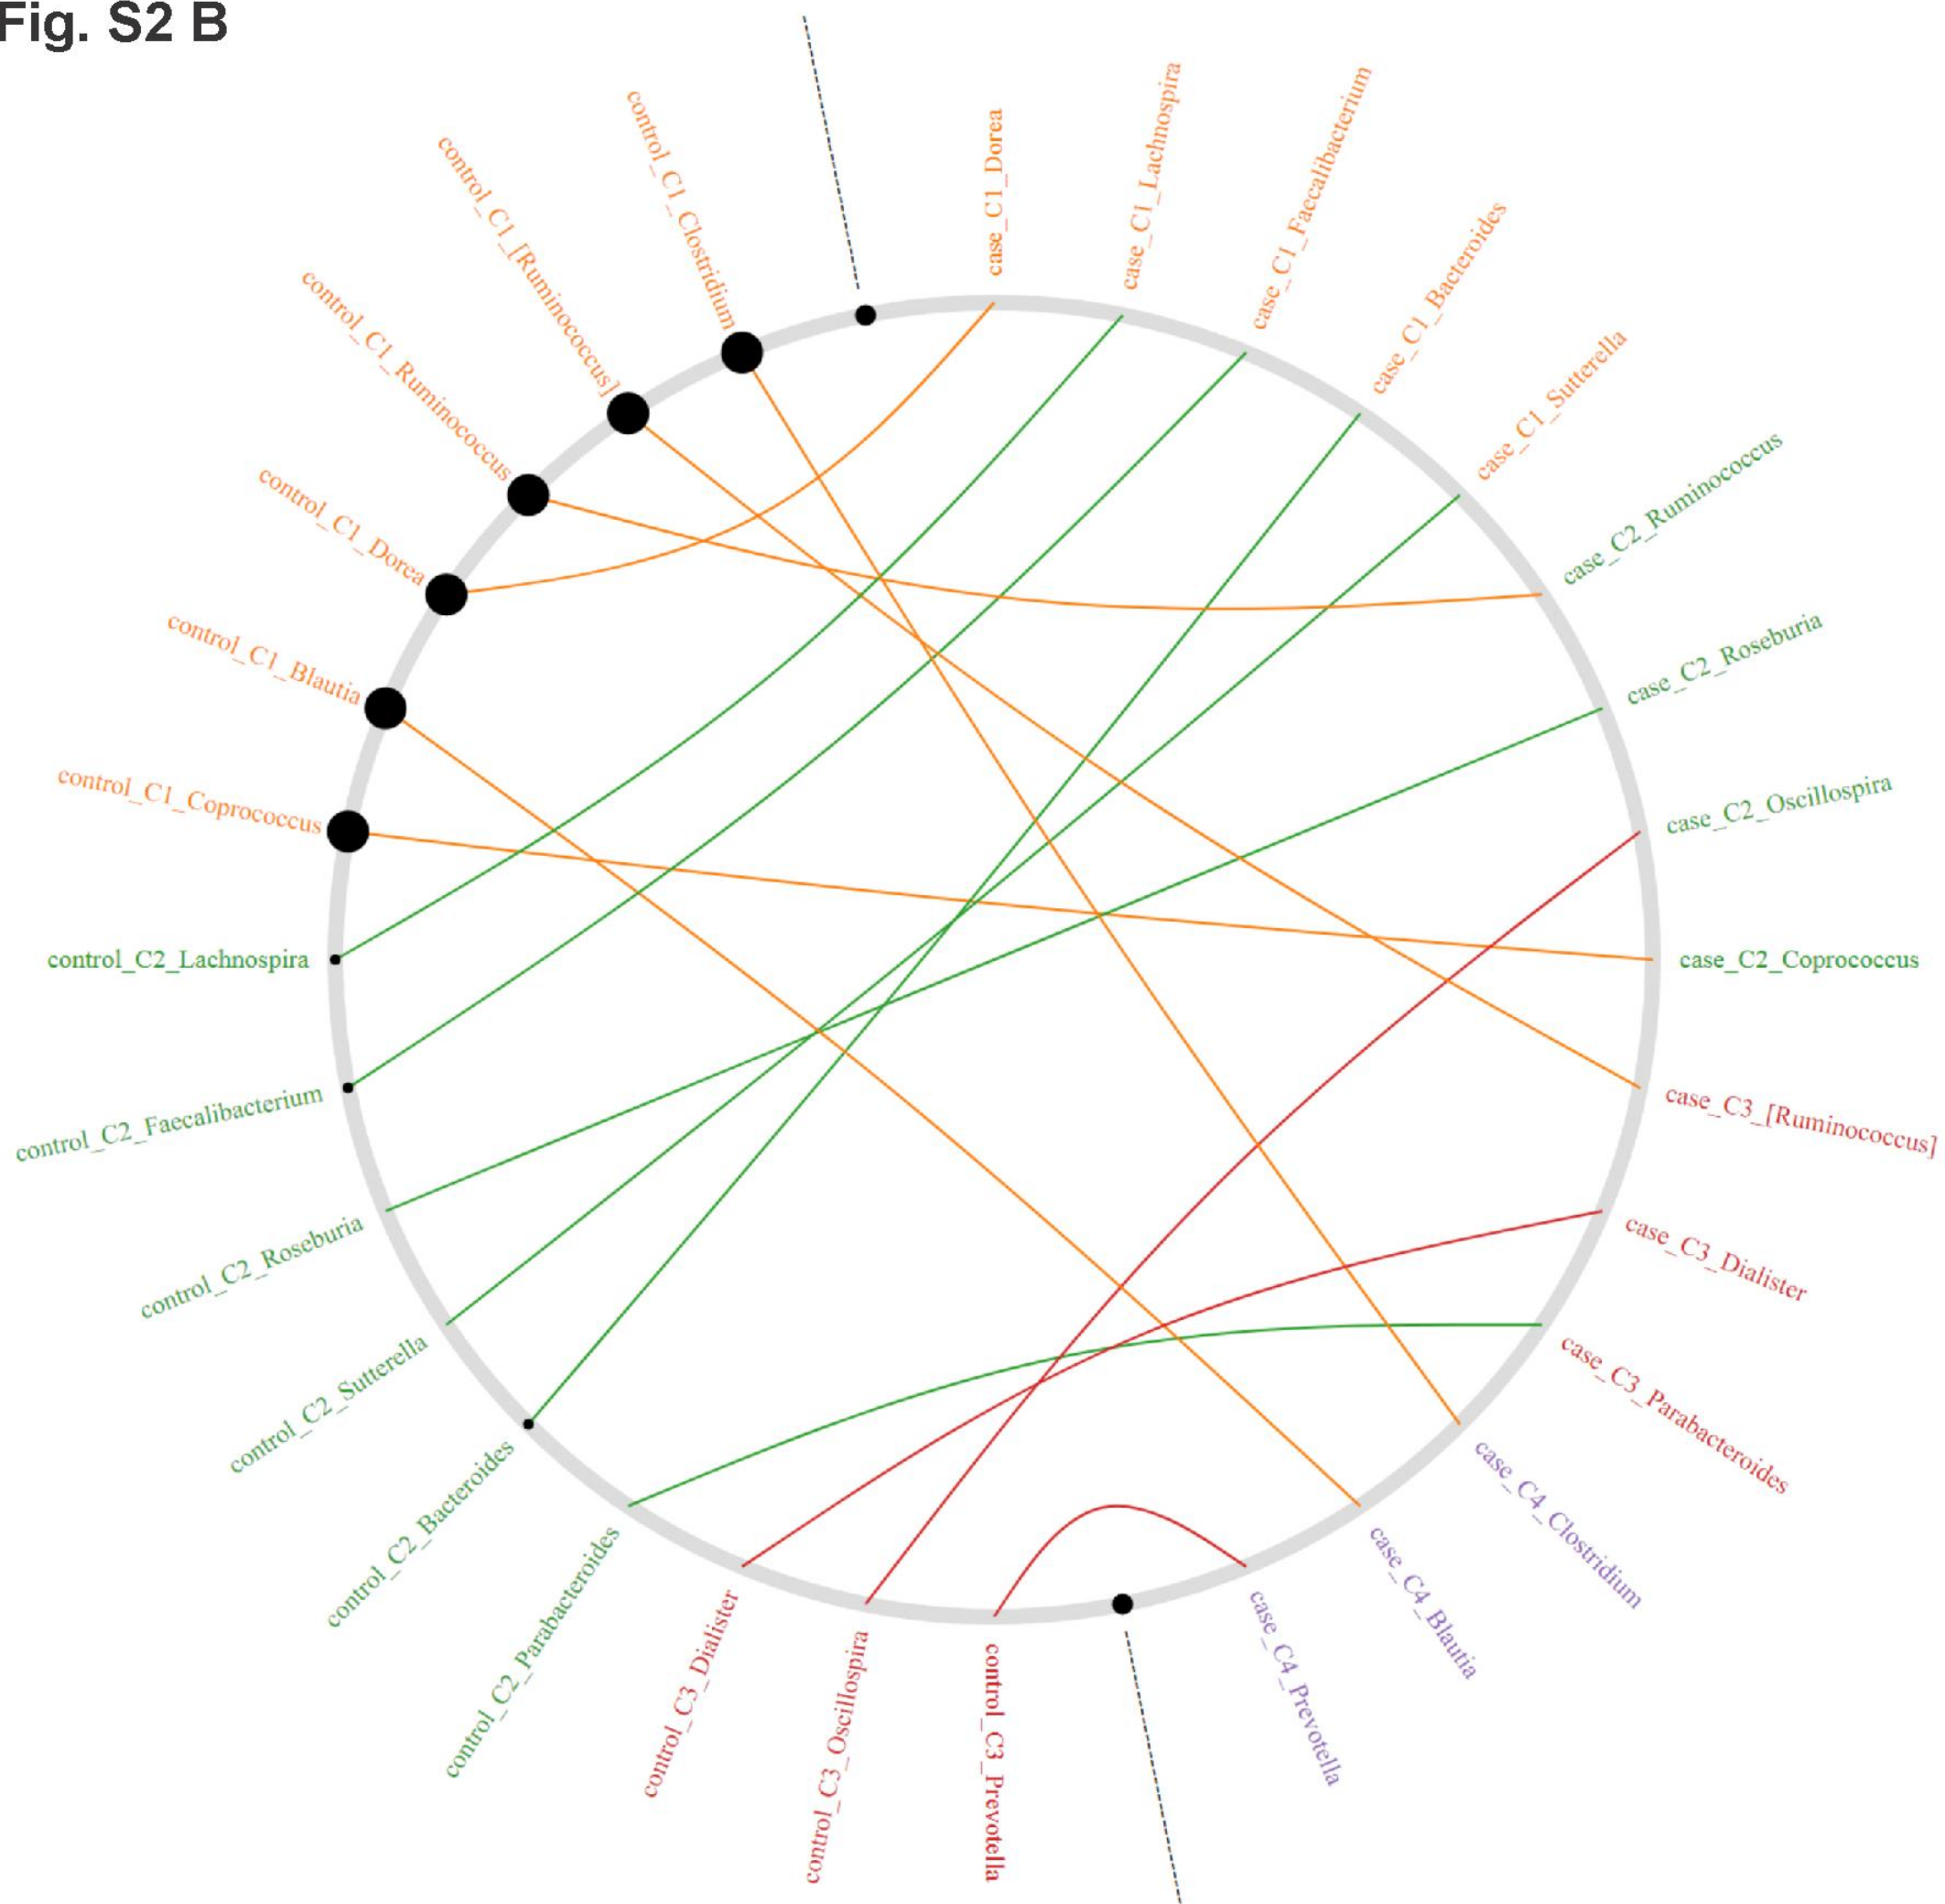

Fig. S2 C

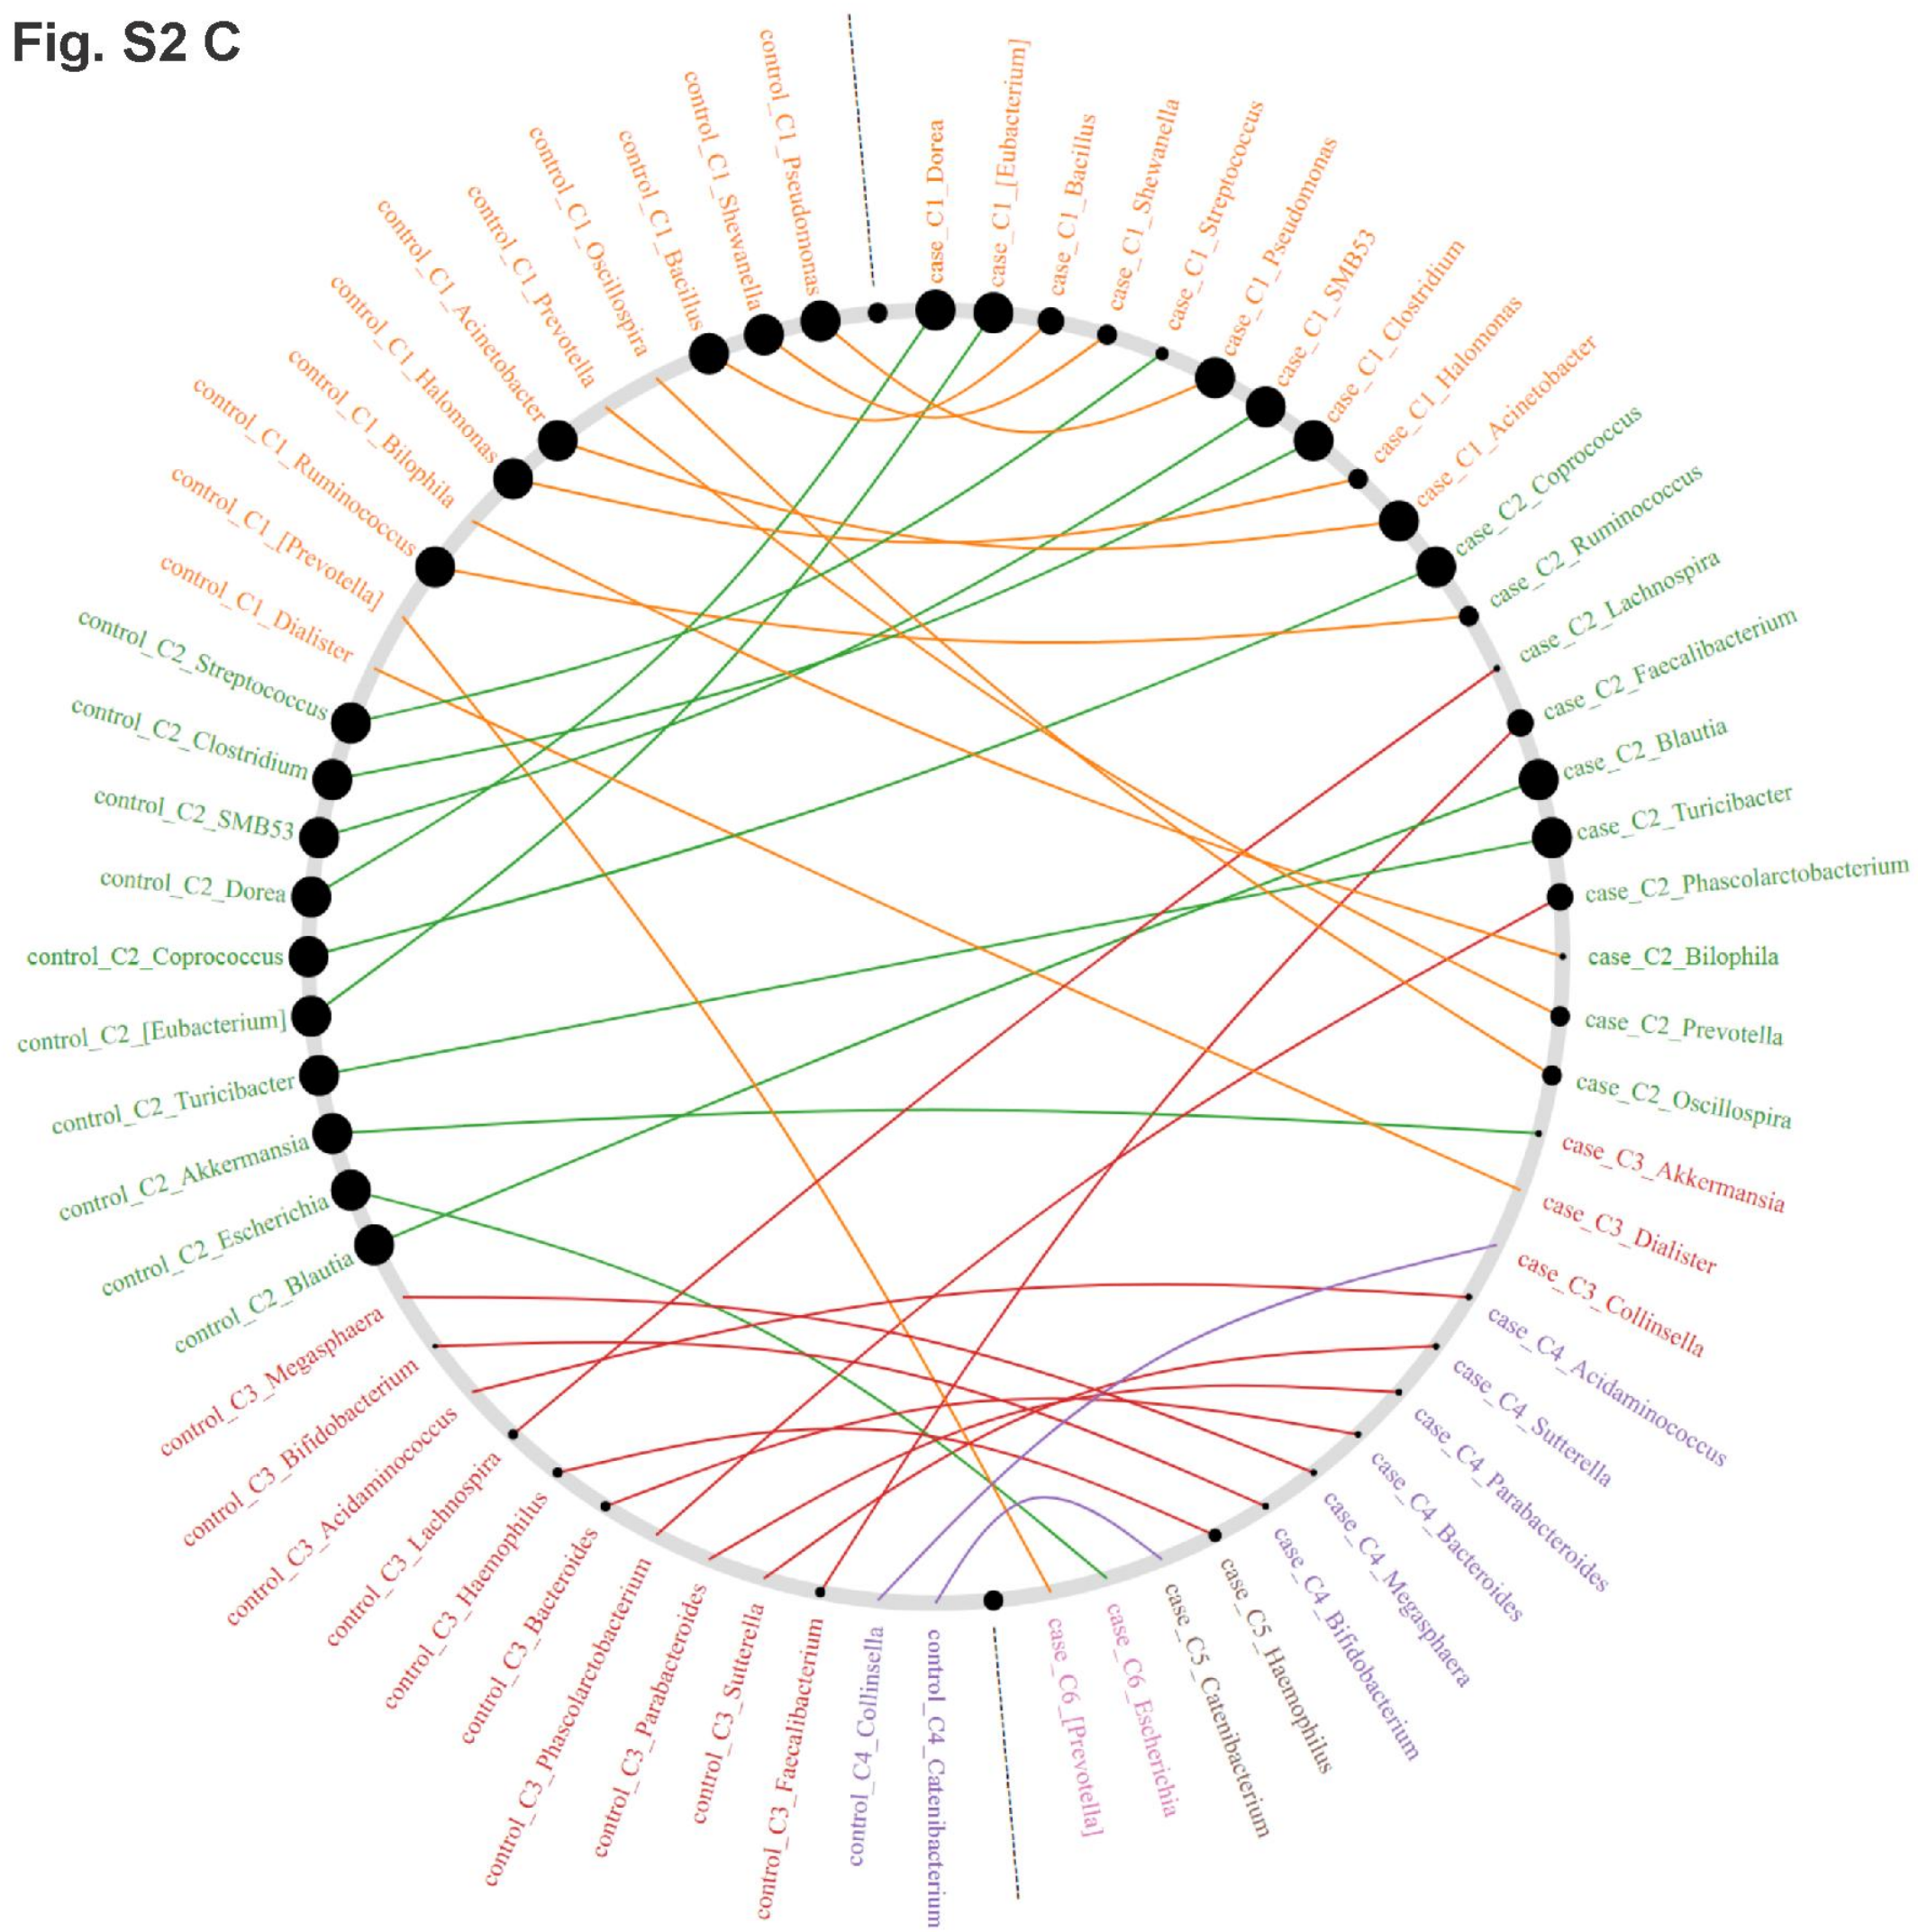

Supplement: mSystems.00578-19-sf002.pdf [file mSystems.00578-19-sf002.pdf]
