# Supplementary material for: The Gut Microbial Diversity of Newly Diagnosed Diabetics but Not of Prediabetics Is Significantly Different from That of Healthy Nondiabetics
Source: PubMed Central journal article supplement (PMC7112960; doi:10.1128/msystems.00578-19), 2020-03-31
Supplement: mSystems.00578-19-st001.pdf [file mSystems.00578-19-st001.pdf]

**Table S1: Sequence statistics for bioinformatics analysis**

| Sample ID | Raw Seqs | Assembled Seq | Filter_fastq_fna | nonChimeraCalls | Biom_Summary_Seqs |
|-----------|----------|---------------|------------------|-----------------|-------------------|
| UNI001    | 325808   | 317774        | 262825           | 207937          | 148052            |
| UNI002    | 483708   | 481520        | 438380           | 403352          | 351695            |
| UNI003    | 502109   | 479608        | 336241           | 289227          | 217603            |
| UNI004    | 432196   | 408085        | 264841           | 205391          | 139160            |
| UNI005    | 501300   | 492854        | 434740           | 397243          | 308504            |
| UNI006    | 262643   | 247356        | 145762           | 130224          | 110919            |
| UNI007    | 397721   | 381351        | 243483           | 187878          | 130530            |
| UNI008    | 268229   | 257278        | 192409           | 161010          | 124209            |
| UNI009    | 341676   | 319247        | 182539           | 138643          | 86778             |
| UNI010    | 373345   | 355098        | 253784           | 204204          | 161663            |
| UNI011    | 942157   | 914502        | 752616           | 628196          | 476638            |
| UNI012    | 312106   | 300483        | 250564           | 214338          | 178028            |
| UNI013    | 607469   | 600084        | 550815           | 487278          | 427145            |
| UNI014    | 612594   | 602440        | 514061           | 442649          | 363787            |
| UNI015    | 614672   | 601640        | 512106           | 417922          | 292855            |
| UNI016    | 580143   | 567036        | 475765           | 397370          | 267412            |
| UNI017    | 562190   | 553668        | 473992           | 399444          | 335125            |
| UNI018    | 613178   | 601606        | 536431           | 443440          | 347472            |
| UNI019    | 674976   | 661651        | 589054           | 480371          | 376404            |
| UNI020    | 318451   | 303823        | 246197           | 210245          | 146343            |
| UNI021    | 599093   | 593670        | 551006           | 455459          | 346339            |
| UNI022    | 476066   | 470585        | 433569           | 399641          | 354007            |
| UNI023    | 656590   | 648535        | 603282           | 443471          | 307675            |
| UNI024    | 592796   | 583006        | 526267           | 470225          | 375338            |
| UNI025    | 938539   | 910019        | 667171           | 589981          | 456698            |
| UNI026    | 258950   | 253392        | 230337           | 182196          | 131758            |
| UNI027    | 296093   | 290551        | 258157           | 196214          | 130998            |
| UNI028    | 467761   | 460007        | 404441           | 340552          | 214539            |
| UNI029    | 746467   | 729820        | 589339           | 448514          | 225929            |
| UNI030    | 351316   | 345642        | 295603           | 212577          | 154796            |
| UNI031    | 254741   | 247618        | 222868           | 164376          | 98920             |
| UNI032    | 1060066  | 901000        | 703428           | 618172          | 471745            |
| UNI033    | 465996   | 458880        | 396801           | 321288          | 174942            |
| UNI034    | 1129829  | 986552        | 758044           | 651649          | 492148            |
| UNI035    | 428054   | 423484        | 369052           | 274069          | 172575            |
| UNI036    | 556940   | 549895        | 477830           | 328985          | 189160            |
| UNI037    | 583820   | 576211        | 498555           | 413840          | 268241            |
| UNI038    | 650866   | 627499        | 495956           | 448805          | 368407            |
| UNI039    | 529730   | 523831        | 456639           | 316176          | 167760            |
| UNI040    | 558996   | 548698        | 451897           | 307237          | 196876            |
| UNI041    | 426750   | 419207        | 356630           | 279454          | 191111            |
| UNI042    | 505673   | 418812        | 334122           | 249791          | 157539            |
| UNI043    | 479656   | 474551        | 409604           | 319438          | 222066            |
| UNI044    | 438923   | 433894        | 374677           | 242635          | 143227            |

|        |         |         |         |         |        |
|--------|---------|---------|---------|---------|--------|
| UNI045 | 485329  | 477847  | 409797  | 332510  | 219605 |
| UNI046 | 419753  | 412981  | 354307  | 298875  | 208622 |
| UNI047 | 408957  | 405276  | 355212  | 240433  | 149934 |
| UNI048 | 463773  | 455918  | 386034  | 271508  | 194482 |
| UNI049 | 466237  | 455500  | 378861  | 309488  | 212528 |
| UNI050 | 298474  | 287820  | 253768  | 188862  | 133477 |
| UNI051 | 619555  | 608349  | 505688  | 300645  | 174814 |
| UNI052 | 978780  | 888733  | 711764  | 639491  | 504859 |
| UNI053 | 1557515 | 1422603 | 1123214 | 1025484 | 834317 |
| UNI055 | 524980  | 515957  | 441767  | 343757  | 244899 |
| UNI056 | 465171  | 446692  | 354476  | 241940  | 176744 |
| UNI057 | 430560  | 424257  | 358883  | 278009  | 157796 |
| UNI058 | 489911  | 477182  | 397854  | 291429  | 206057 |
| UNI059 | 555051  | 537879  | 441433  | 315840  | 169119 |
| UNI061 | 300172  | 287169  | 251575  | 183138  | 127021 |
| UNI062 | 413398  | 405471  | 334803  | 238320  | 156469 |
| UNI063 | 325354  | 320320  | 266225  | 185705  | 132161 |
| UNI064 | 552490  | 542777  | 451155  | 303819  | 210331 |
| UNI066 | 352202  | 348157  | 294810  | 207603  | 132367 |
| UNI067 | 461843  | 452229  | 370774  | 257355  | 183960 |
| UNI068 | 405111  | 392411  | 303577  | 244645  | 147989 |
| UNI069 | 334189  | 322093  | 271780  | 208761  | 140503 |
| UNI071 | 1053289 | 902332  | 733227  | 706867  | 650284 |
| UNI072 | 481236  | 473068  | 376956  | 301160  | 154425 |
| UNI074 | 584889  | 570031  | 448883  | 350312  | 237095 |
| UNI075 | 445242  | 436726  | 350009  | 244757  | 183253 |
| UNI076 | 533537  | 518408  | 444407  | 324653  | 220062 |
| UNI077 | 467347  | 450009  | 345392  | 258624  | 178777 |
| UNI078 | 669923  | 666798  | 590502  | 408400  | 328186 |
| UNI080 | 1065370 | 923652  | 725331  | 622733  | 576486 |
| UNI081 | 507814  | 499053  | 440009  | 305845  | 208940 |
| UNI082 | 594903  | 576922  | 466167  | 328998  | 198034 |
| UNI083 | 455860  | 427943  | 374781  | 303121  | 258844 |
| UNI084 | 378129  | 373653  | 333504  | 226998  | 126040 |
| UNI085 | 325372  | 320820  | 280681  | 210236  | 133330 |
| UNI087 | 697285  | 657180  | 537975  | 461305  | 348749 |
| UNI090 | 720269  | 669639  | 563985  | 472708  | 398147 |
| UNI091 | 1191033 | 1099589 | 899421  | 775722  | 603310 |
| UNI092 | 995037  | 936620  | 809177  | 741980  | 658507 |
| UNI093 | 1063258 | 898635  | 736022  | 686593  | 625858 |
| UNI094 | 944921  | 835281  | 678606  | 583604  | 443912 |
| UNI095 | 1085820 | 991546  | 826107  | 727521  | 557935 |
| UNI096 | 673924  | 641175  | 542430  | 491470  | 443372 |
| UNI097 | 1489577 | 1390519 | 1150192 | 958341  | 734747 |
| UNI098 | 493141  | 473496  | 398585  | 353577  | 292826 |
| UNI101 | 1288744 | 1246341 | 1127401 | 996590  | 677571 |
| UNI102 | 1320069 | 1274565 | 1153626 | 985735  | 763401 |

|        |         |         |         |         |        |
|--------|---------|---------|---------|---------|--------|
| UNI103 | 1061633 | 1024561 | 925979  | 758727  | 606719 |
| UNI104 | 778363  | 752264  | 676345  | 564162  | 406354 |
| UNI105 | 1008650 | 975857  | 882415  | 790085  | 579880 |
| UNI106 | 1062156 | 1029001 | 931629  | 859384  | 670110 |
| UNI107 | 1205907 | 1170208 | 1050754 | 875982  | 667837 |
| UNI108 | 1351104 | 1305182 | 1175807 | 902221  | 534575 |
| UNI109 | 996742  | 963692  | 873780  | 781028  | 665789 |
| UNI110 | 1050025 | 1015930 | 913223  | 790328  | 593221 |
| UNI111 | 799313  | 772191  | 698712  | 606041  | 500007 |
| UNI112 | 1548277 | 1495505 | 1339954 | 1208573 | 871401 |
| UNI113 | 1112830 | 1070558 | 969214  | 909785  | 734429 |
