# Supplementary material for: The Gut Microbial Diversity of Newly Diagnosed Diabetics but Not of Prediabetics Is Significantly Different from That of Healthy Nondiabetics
Source: PubMed Central journal article supplement (PMC7112960; doi:10.1128/msystems.00578-19), 2020-03-31
Supplement: mSystems.00578-19-st005.pdf [file mSystems.00578-19-st005.pdf]

**Table S5 : Distribution of rare OTUs across four study groups**

| Sr. No. | Taxonomy         | ND Rare OTUs % | Sr. No. | Taxonomy        | PreDMs Rare OTUs % |
|---------|------------------|----------------|---------|-----------------|--------------------|
| 1       | Bacteroidetes    | 64.09225114    | 1       | Bacteroidetes   | 61.99431899        |
| 3       | Firmicutes       | 17.65432127    | 2       | Firmicutes      | 22.26860734        |
| 7       | Proteobacteria   | 6.040022573    | 3       | Proteobacteria  | 8.182144818        |
| 2       | Verrucomicrobia  | 5.989933739    | 4       | Actinobacteria  | 3.404605821        |
| 4       | Actinobacteria   | 2.897845018    | 5       | Cyanobacteria   | 2.001640578        |
| 6       | Cyanobacteria    | 1.9811662      | 6       | Verrucomicrobia | 1.133151198        |
| 5       | Elusimicrobia    | 1.073389111    | 7       | Elusimicrobia   | 0.661044411        |
| 8       | Lentisphaerae    | 0.117449681    | 8       | Lentisphaerae   | 0.166159353        |
| 9       | Synergistetes    | 0.04852771     | 9       | Tenericutes     | 0.08962165         |
| 11      | Tenericutes      | 0.036071933    | 10      | [Thermi]        | 0.036743521        |
| 10      | Spirochaetes     | 0.02075963     | 11      | Synergistetes   | 0.026439065        |
| 12      | Crenarchaeota    | 0.012123624    | 12      | Chloroflexi     | 0.008541852        |
| 13      | [Thermi]         | 0.009798545    | 13      | Fusobacteria    | 0.007728342        |
| 17      | Acidobacteria    | 0.006676297    | 14      | Acidobacteria   | 0.004948851        |
| 18      | Nitrospirae      | 0.005148388    | 15      | FBP             | 0.003457416        |
| 20      | Chloroflexi      | 0.004982311    | 16      | Spirochaetes    | 0.002508322        |
| 14      | Planctomycetes   | 0.004085495    | 17      | Planctomycetes  | 0.002101567        |
| 15      | Fusobacteria     | 0.001727201    | 18      | TM7             | 0.001559227        |
| 16      | NC10             | 0.001727201    | 19      | Nitrospirae     | 0.001423642        |
| 19      | TM6              | 0.001195755    | 20      | Euryarchaeota   | 0.00108468         |
| 21      | Gemmatimonadetes | 0.00079717     | 21      | Crenarchaeota   | 0.001016887        |
|         |                  |                | 22      | GAL15           | 0.000338962        |
|         |                  |                | 23      | Gemmatimonadet  | 6.77925E-05        |

| Sr. No. | Taxonomy        | NewDMs Rare OTUs % | Sr. No. | Taxonomy        | KnownDMs Rare OTUs % |
|---------|-----------------|--------------------|---------|-----------------|----------------------|
| 1       | Bacteroidetes   | 41.31654216        | 1       | Firmicutes      | 55.1049318           |
| 3       | Firmicutes      | 38.46668832        | 2       | Proteobacteria  | 20.06765739          |
| 2       | Proteobacteria  | 16.14309512        | 3       | Bacteroidetes   | 13.87723439          |
| 5       | Actinobacteria  | 2.659067336        | 4       | Actinobacteria  | 6.838666859          |
| 4       | Cyanobacteria   | 0.906995505        | 5       | Cyanobacteria   | 0.803807087          |
| 6       | Tenericutes     | 0.289375255        | 6       | Verrucomicrobia | 0.483889573          |
| 7       | Elusimicrobia   | 0.194558237        | 7       | Acidobacteria   | 0.424645589          |
| 8       | Euryarchaeota   | 0.013620124        | 8       | Crenarchaeota   | 0.423881151          |
| 9       | Lentisphaerae   | 0.006705292        | 9       | Planctomycetes  | 0.377632621          |
| 10      | Fusobacteria    | 0.001571553        | 10      | [Thermi]        | 0.327561899          |
| 11      | TM7             | 0.001047702        | 11      | Tenericutes     | 0.318770856          |
| 13      | Verrucomicrobia | 0.000314311        | 12      | Nitrospirae     | 0.24003369           |
| 12      | Synergistetes   | 0.000314311        | 13      | Chloroflexi     | 0.215953877          |
| 14      | [Thermi]        | 0.00010477         | 14      | Lentisphaerae   | 0.091350401          |
|         |                 |                    | 15      | Euryarchaeota   | 0.089821524          |
|         |                 |                    | 16      | Gemmatimonadet  | 0.060008423          |
|         |                 |                    | 17      | Synergistetes   | 0.055421792          |
|         |                 |                    | 18      | Fusobacteria    | 0.043572995          |

|    |                 |             |
|----|-----------------|-------------|
| 19 | TM7             | 0.042044118 |
| 20 | NC10            | 0.028284225 |
| 21 | WS3             | 0.017582086 |
| 22 | WPS-2           | 0.012231016 |
| 23 | GAL15           | 0.011848797 |
| 24 | KSB3            | 0.009555481 |
| 25 | Thermotogae     | 0.009555481 |
| 26 | Spirochaetes    | 0.00535107  |
| 27 | SBR1093         | 0.004586631 |
| 28 | Deferribacteres | 0.004586631 |
| 29 | Elusimicrobia   | 0.003822193 |
| 30 | Chlorobi        | 0.002293316 |
| 31 | Armatimonadetes | 0.001528877 |
| 32 | GN02            | 0.000764439 |
| 33 | AD3             | 0.000764439 |
| 34 | NKB19           | 0.000382219 |
